# Supplementary material
Source: PubMed Central journal article supplement (PMC3086375)
Supplement: NIHMS283020-supplement-1_si_001.pdf [file NIHMS283020-supplement-1_si_001.pdf]

## Supplementary information

### A $C_3$ Symmetric Nitrate Complex with a Thiophene-Based Tripodal Receptor

Muhammet Işıklan,<sup>1</sup> Musabbir A. Saeed,<sup>1</sup> Avijit Pramanik,<sup>1</sup> Bryan M. Wong,<sup>2</sup> Frank R. Fronczek,<sup>3</sup> and Md. Alamgir Hossain\*<sup>1</sup>

<sup>1</sup>Department of Chemistry and Biochemistry, Jackson State University, Jackson, Mississippi 39217

<sup>2</sup>Materials Chemistry Department, Sandia National Laboratories, Livermore, California 94551

<sup>3</sup>Department of Chemistry, Louisiana State University, Baton Rouge, Louisiana 70803

#### Synthesis

**L:** To a solution of 2-thiophene aldehyde (4.60 g, 41 mmol) in diethylether (50 mL) was added tris(2-aminoethyl)-amine (2.00 g, 13.7 mmol) in ethanol (50 mL). The mixture was stirred overnight at room temperature, and the solvent was evaporated. After diluting with methanol (100 mL), NaBH<sub>4</sub> (2.00 g) was added. The reaction mixture was stirred for another 24 hr. After evaporating the solvent, the residue was partitioned in water/CH<sub>2</sub>Cl<sub>2</sub> (50/50 mL). The organic layers were collected and dried with MgSO<sub>4</sub> to give an oily product. Yield = 4.38 g (74%). <sup>1</sup>H NMR (500 MHz, CD<sub>3</sub>Cl, TMS):  $\delta$  7.106 (m, 3H, Ar), 6.856 (m, 3H, Ar), 6.815 (m, 3H, Ar), 3.873 (s, 6H, ArCH<sub>2</sub>), 2.613 (t,  $J = 5.8$  Hz, 6H, NCH<sub>2</sub>CH<sub>2</sub>), 2.497 (t,  $J = 5.8$  Hz, 6H, NCH<sub>2</sub>CH<sub>2</sub>), <sup>13</sup>C NMR (125 MHz, CD<sub>3</sub>Cl, TMS):  $\delta$  144.1 (Ar), 126.7 (Ar), 125.0 (Ar), 124.4 (Ar), 54.3 (Ar-CH<sub>2</sub>), 48.4 (NCH<sub>2</sub>CH<sub>2</sub>), 46.9 (NCH<sub>2</sub>CH<sub>2</sub>), MS (ESI) ( $m/z$ ): [M+1]<sup>+</sup> calcd for C<sub>21</sub>H<sub>31</sub>N<sub>4</sub>S<sub>3</sub><sup>+</sup>, 435.2; found 435.2.

[H<sub>3</sub>L(NO<sub>3</sub>)](NO<sub>3</sub>)<sub>2</sub>: The nitrate salt was prepared from the reaction of the free amine (0.20 g, 0.47 mmol) with HNO<sub>3</sub> in ethanol. The white precipitate was obtained after evaporation of the solvent. Crystals suitable for X-ray analysis were grown from slow evaporation of the aqueous solution of the salt. <sup>1</sup>H NMR (500 MHz, CD<sub>3</sub>Cl, TMS):  $\delta$  7.590 (m, 3H, Ar), 7.289 (m, 3H, Ar), 7.152 (m, 3H, Ar), 4.482 (s, 6H, Ar-CH<sub>2</sub>), 3.143 (t,  $J = 6.5$  Hz, 6H, NCH<sub>2</sub>CH<sub>2</sub>), 2.849 (t,  $J = 6.5$  Hz, 6H, NCH<sub>2</sub>CH<sub>2</sub>), <sup>13</sup>C NMR (125 MHz, CD<sub>3</sub>Cl, TMS):  $\delta$  134.12 (Ar), 134.09 (Ar), 131.80 (Ar), 130.82 (Ar), 51.70 (Ar-CH<sub>2</sub>), 47.87 (NCH<sub>2</sub>CH<sub>2</sub>), 46.04 (NCH<sub>2</sub>CH<sub>2</sub>).

[H<sub>3</sub>L](TsO)<sub>3</sub>: The tosyl salt was prepared from the reaction of the free amine (0.20 g, 0.47 mmol) with *p*-Toluenesulfonic acid (0.27 g, 1.41 mmol) in methanol. The white precipitate was obtained after evaporation of the solvent. <sup>1</sup>H NMR (500 MHz, CD<sub>3</sub>Cl, TMS):  $\delta$  8.782 (bs, 6H, NH<sub>2</sub>), 7.689 (d,  $J = 8$  Hz, 6H, TsAr), 7.133 (d,  $J = 5.0$  Hz, 3H, Ar), 7.089 (d,  $J = 8$  Hz, 6H, TsAr), 6.949 (bs, 3H, Ar), 6.715 (m, 3H, Ar), 4.334 (s, 6H, Ar-CH<sub>2</sub>), 3.493 (s, 6H, NCH<sub>2</sub>CH<sub>2</sub>), 3.190 (s, 6H, NCH<sub>2</sub>CH<sub>2</sub>), 3.303 (s, 9H, TsCH<sub>3</sub>).

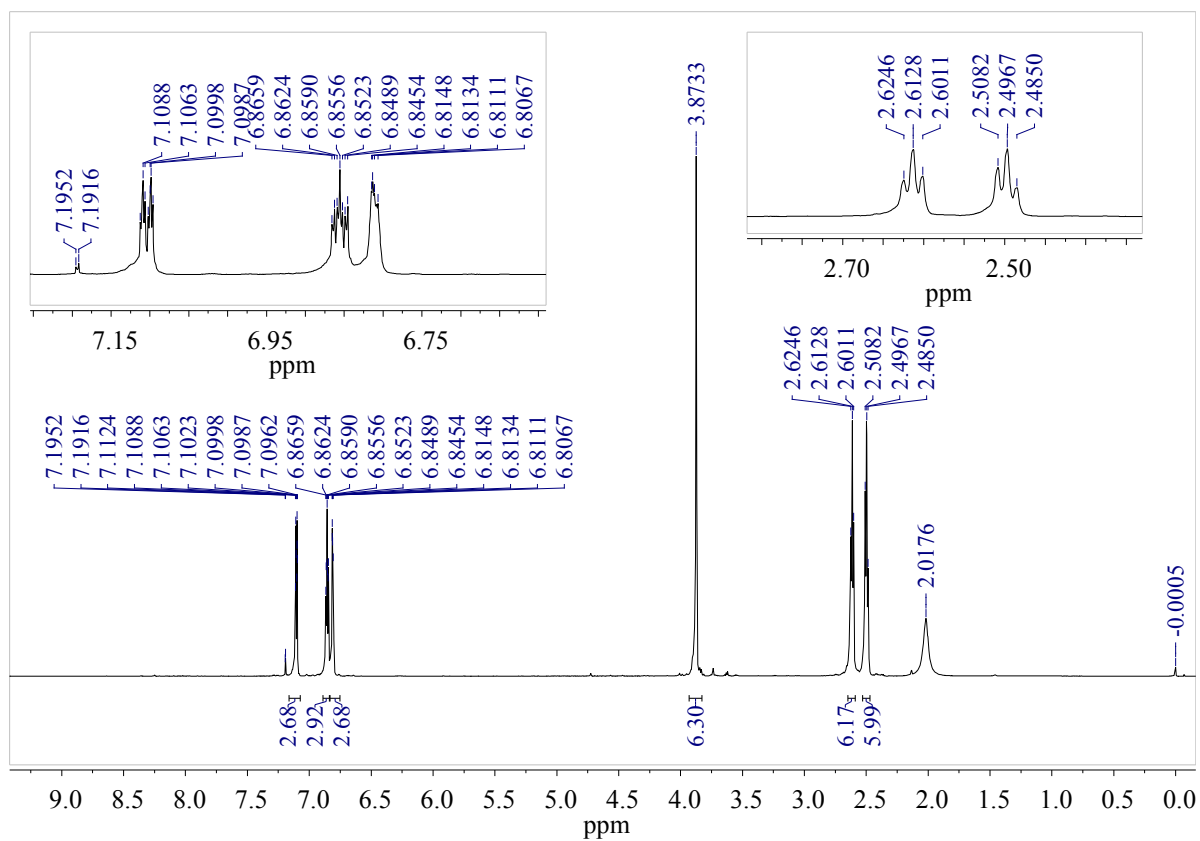

**Figure S1.  $^1\text{H}$  NMR spectra of L**

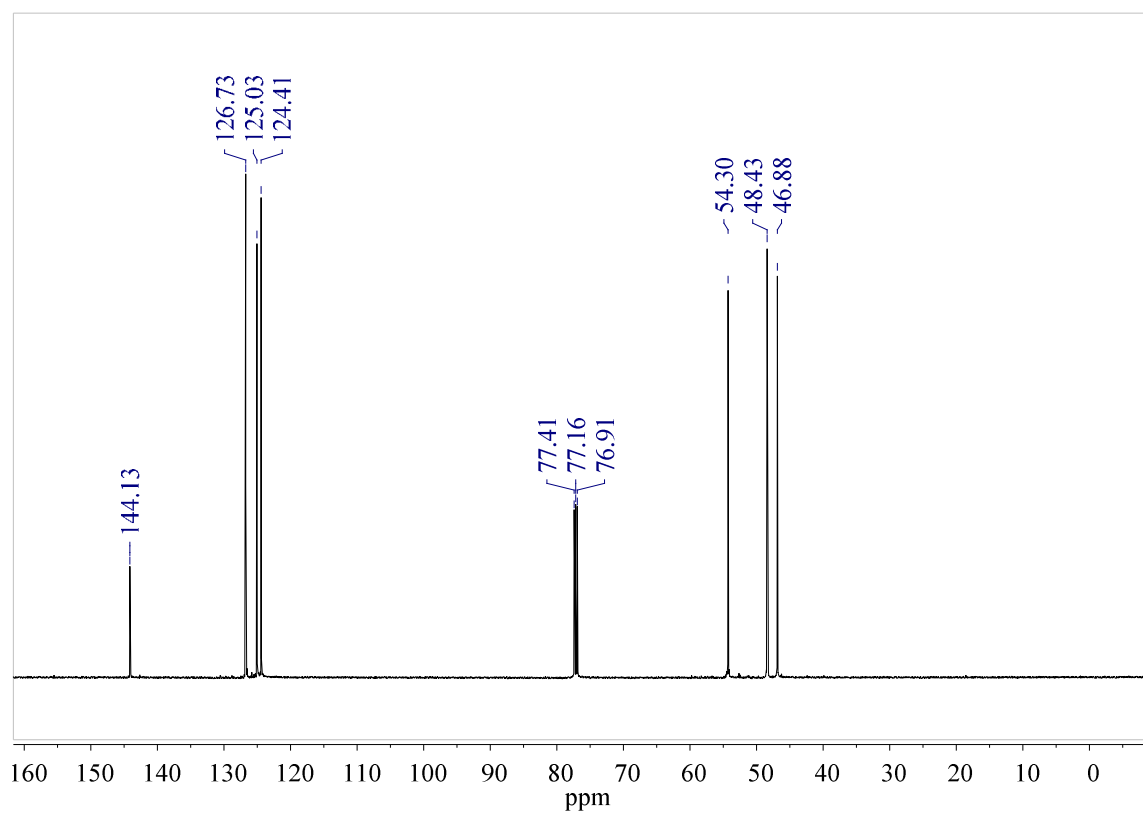

**Figure S2.  $^{13}\text{C}$  NMR spectra of L.**

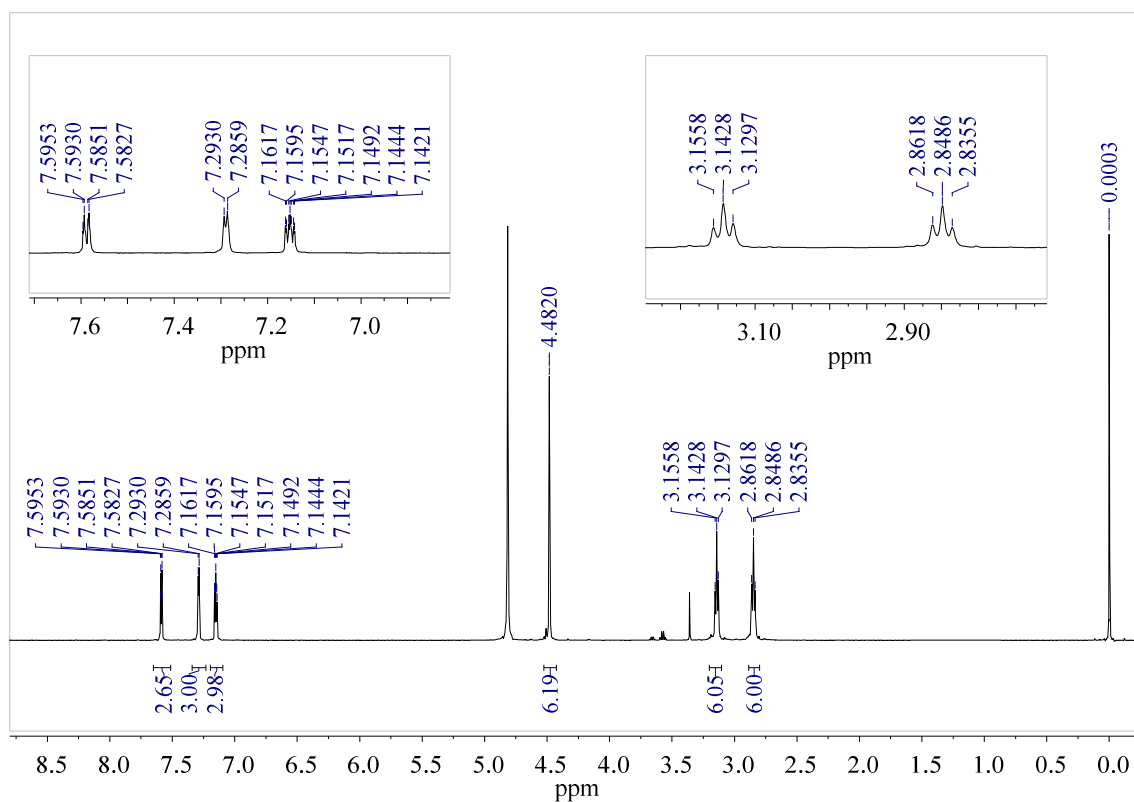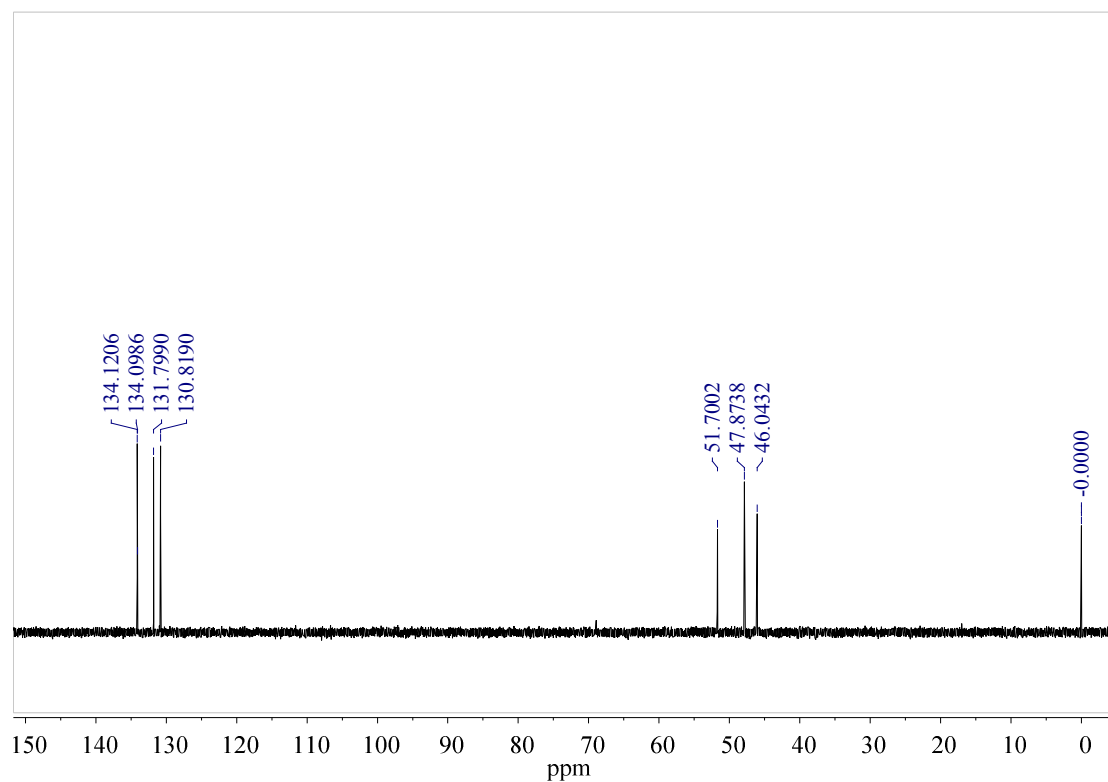

**Figure S4.  $^{13}\text{C}$  NMR spectra of  $[\text{H}_3\text{L}(\text{NO}_3)](\text{NO}_3)_2$ .**

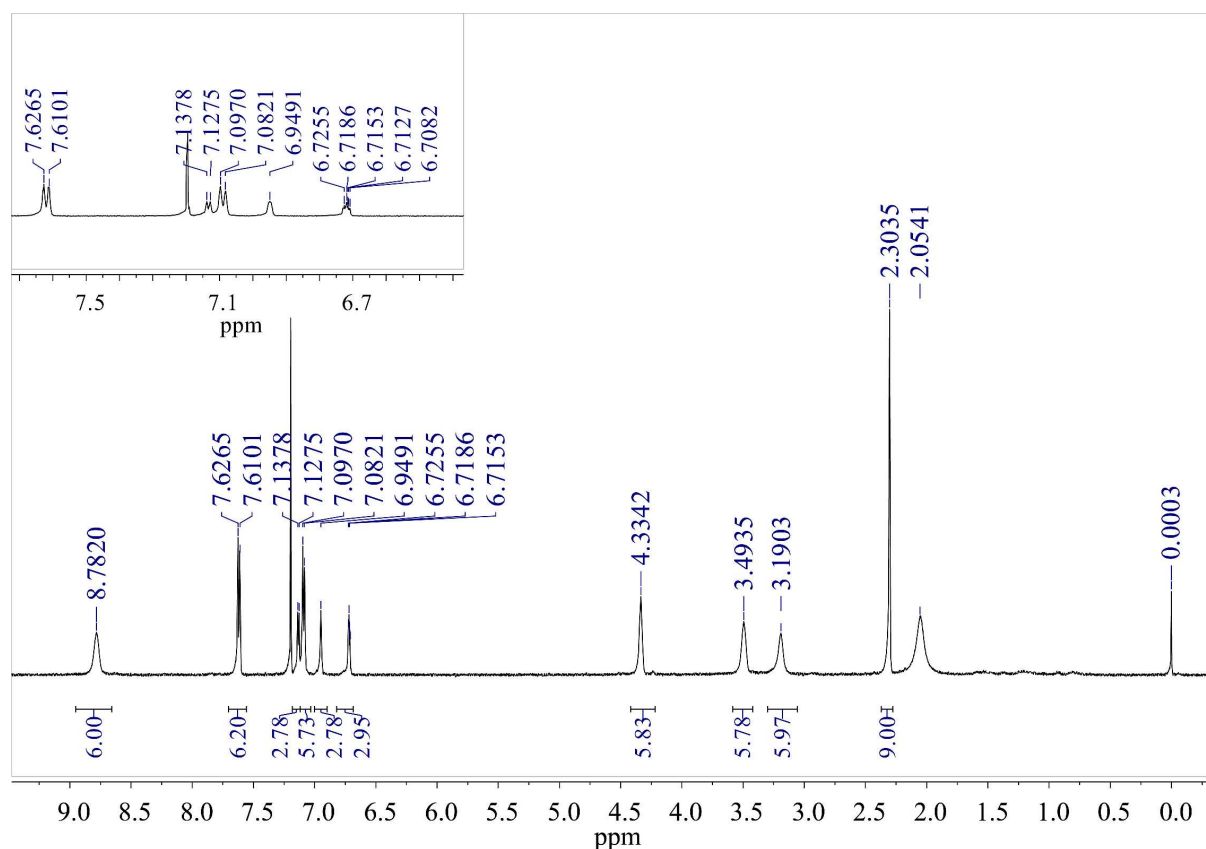

**Figure S5.** <sup>1</sup>H NMR spectra of [H<sub>3</sub>L(TsO)<sub>3</sub>].

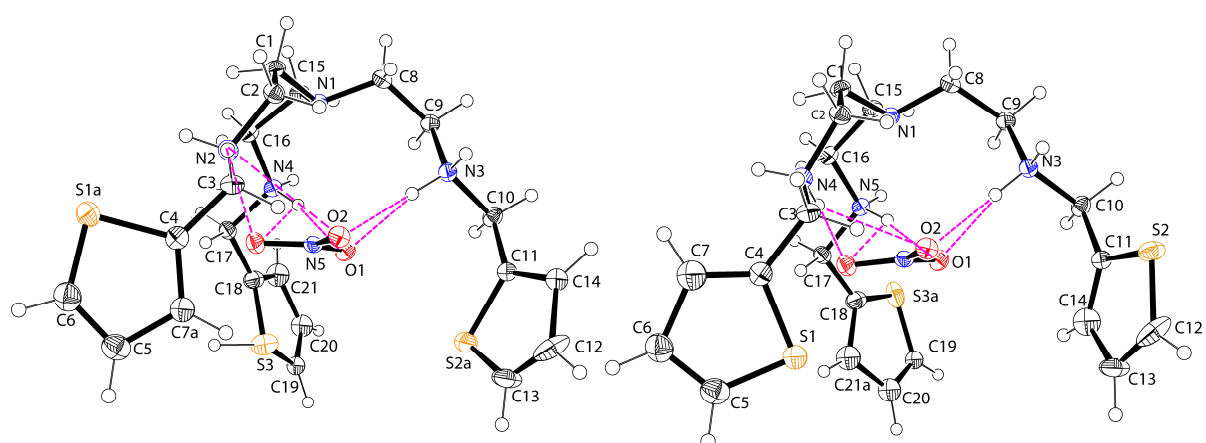

**Figure S6.** Ortep views of [H<sub>3</sub>L(NO<sub>3</sub>)<sub>2</sub>]<sup>2+</sup> motif showing two positions of thiophene units. In the two positions, all three thiophene units exhibit disorder over two positions related by approximate twofold rotations about C-C bonds linking them to aliphatic groups. The major component (shown left) has populations in the range 0.515(4) - 0.587(5).

**Binding Constant (K):** Binding constants were obtained by  $^1\text{H}$  NMR titrations of ligand **L** with tetrabutylammonium salts in  $\text{CDCl}_3$ . All the NMR measurements were carried out using the Varian 500 MHz at room temperature. Initial concentrations were  $[\text{L}]_0 = 2 \text{ mM}$ , and  $[\text{anion}]_0 = 20 \text{ mM}$ . Each titration was performed by 14-16 measurements at room temperature. The association constant  $K$  was calculated using Sigma Plot software, from the equations:  $\Delta\delta = ([\text{A}]_0 + [\text{L}]_0 + 1/K - \{([\text{A}]_0 + [\text{L}]_0 + 1/K)^2 - 4[\text{L}]_0[\text{A}]_0\}^{1/2}) \Delta\delta_{\text{max}}/2[\text{L}]_0$  ( $\text{A} = \text{anion}$ ). The error limit in  $K$  was less than 10%.

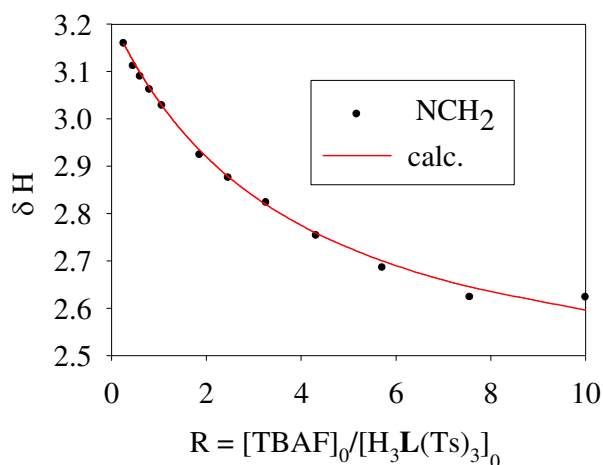

**Figure S7.**  $^1\text{H}$  NMR titration curves of  $[\text{H}_3\text{L}](\text{TsO})_3$  (2mM) with TBAF (20mM) in  $\text{CDCl}_3$  at 298 K.

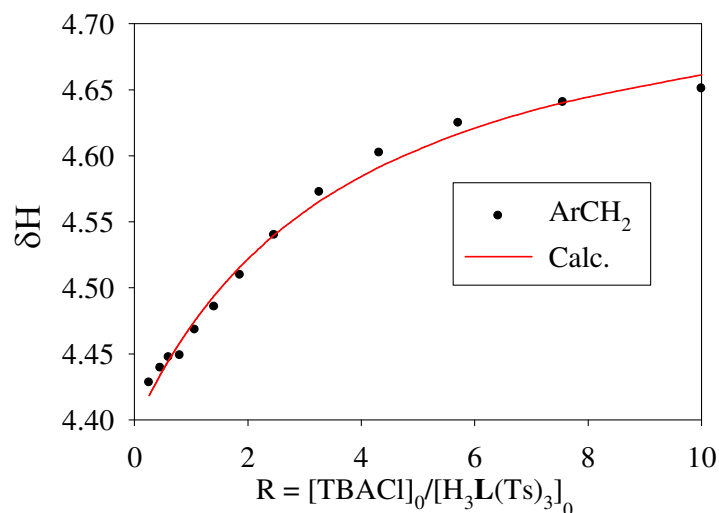

**Figure S8.**  $^1\text{H}$  NMR titration curves of  $[\text{H}_3\text{L}](\text{TsO})_3$  (2mM) with TBACl (20mM) in  $\text{CDCl}_3$  at 298 K.

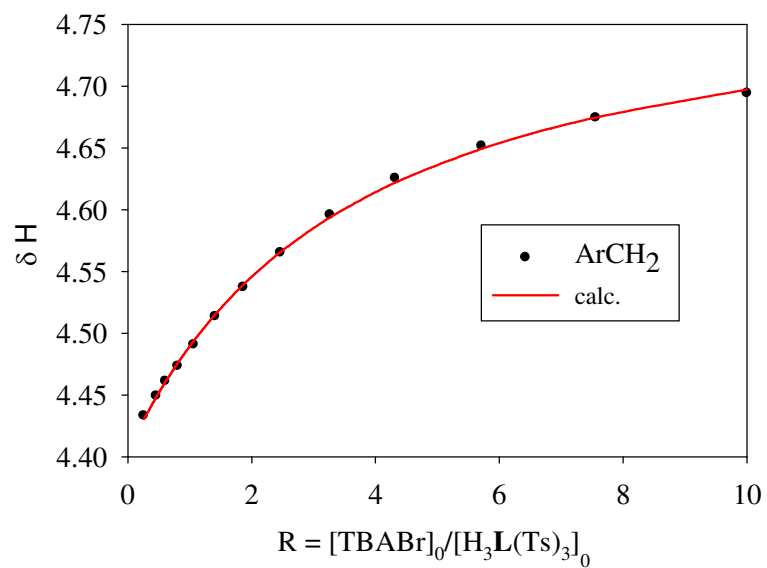

**Figure S9.**  $^1\text{H}$  NMR titration curves of  $[\text{H}_3\text{L}](\text{TsO})_3$  (2mM) with TBABr (20mM) in  $\text{CDCl}_3$  at 298 K.

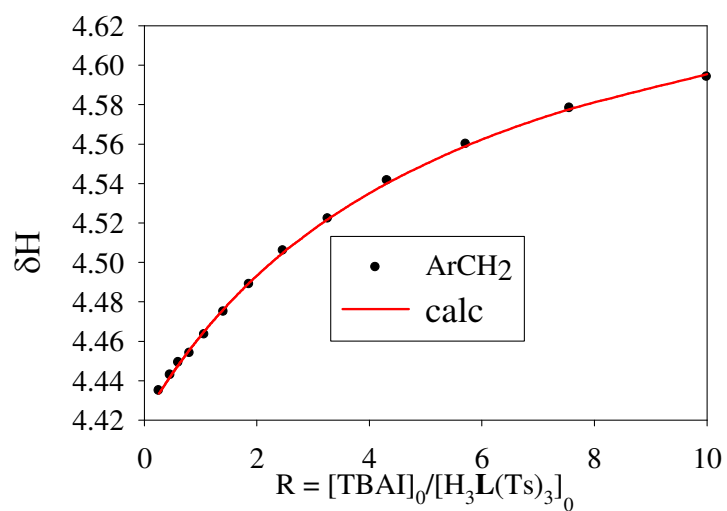

**Figure S10.**  $^1\text{H}$  NMR titration curves of  $[\text{H}_3\text{L}](\text{TsO})_3$  (2mM) with TBAI (20mM) in  $\text{CDCl}_3$  at 298 K.

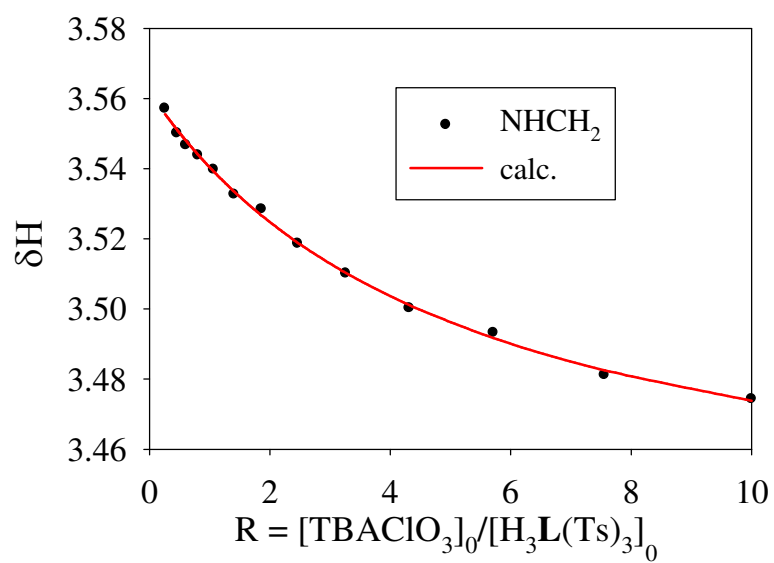

**Figure S11.**  $^1\text{H}$  NMR titration curves of  $[\text{H}_3\text{L}](\text{TsO})_3$  (2mM) with  $\text{TBAClO}_4$  (20mM) in  $\text{CDCl}_3$  at 298 K.
